# Supplementary material
Source: HighWire-hosted journal article supplement (https://bmjopen.bmj.com/content/15/1/e078271)
Supplement: inline-supplementary-material-1 [file inline-supplementary-material-1.pdf]

Supplementary Table 1.

| Internationally representative guidance guidelines |                                                                          |                                                                                                                                                                                                                                                                            |
|----------------------------------------------------|--------------------------------------------------------------------------|----------------------------------------------------------------------------------------------------------------------------------------------------------------------------------------------------------------------------------------------------------------------------|
| Methodology                                        | Working group direction                                                  | The specific role in the development of this guideline                                                                                                                                                                                                                     |
| Working Group                                      |                                                                          |                                                                                                                                                                                                                                                                            |
| WHO handbook for guideline development             | Guideline formulation                                                    | Provide a systematic approach and framework for developing high-quality guidelines.                                                                                                                                                                                        |
| RIGHT                                              | Guideline report                                                         | Provide a structured checklist for a systematic and comprehensive reporting guide, and the development of the guide with reference to the RIGHT reporting norms ensures greater regularity and transparency in reporting.                                                  |
| Guideline 2.0                                      | Guideline formulation                                                    | A comprehensive checklist systematically developed for the successful development of guidelines. Careful consideration of the entries in the checklist will assist in the development, implementation and evaluation of the guidelines.                                    |
| AGREE II                                           | Evaluation of the methodological quality of the guidelines               | AGREE II serves as a methodological quality assessment tool for guidelines, with results reflecting the rigor and scientific validity of the development process. To ensure that the guidelines we reference and develop meet high standards of development and reporting. |
| GRADE                                              | Grading the quality of guideline evidence and strength of recommendation | Provides a clear, comprehensive grading and summarization methodology for quality grading the evidence on which it relies to support its recommendations.                                                                                                                  |

Supplementary Table 2.

The composition and responsibilities of the guideline working groups

| Group                  | Composition                                                                                                                                                                                                                              | Responsibility                                                                                                                                                                                                                                                                                                                                                                                                                                                                                                                    |
|------------------------|------------------------------------------------------------------------------------------------------------------------------------------------------------------------------------------------------------------------------------------|-----------------------------------------------------------------------------------------------------------------------------------------------------------------------------------------------------------------------------------------------------------------------------------------------------------------------------------------------------------------------------------------------------------------------------------------------------------------------------------------------------------------------------------|
| Steering committee     | one clinical chairman, one methodology chairman, one government representative, two experienced ICU nursing specialists, two experienced ICU clinical specialists, and two respiratory therapists with rich respiratory care experience. | (I) determine the theme and scope of the guideline and construct key issues according to PICO format<br><br>(II) establish the guideline consensus expert group, guideline secretariat, evidence evaluation group, and external audit expert group<br><br>(III) assess conflicts of interest and address any conflicts as needed<br><br>(IV) chair the guideline working meetings<br><br>(V) review and approval the plan<br><br>(VI) approve recommendations and the full guideline<br><br>(VII) revise and update the guideline |
| Consensus expert group | consists of 25 to 30 experts in the fields of critical care, respiratory, pediatrics, neonatology, and respiratory therapists.                                                                                                           | (I) identify key issues for the guideline and prioritize topics for assessment<br><br>(II) formulate recommendations on some issues<br><br>(III) reach consensus on the recommendations<br><br>(IV) modify the full text of the guideline based on feedback<br><br>(V) publish and promote the guideline                                                                                                                                                                                                                          |

| Group                     | Composition                                                                                            | Responsibility                                                                                                                                                                                                                                                                                                                                                                                                                                                                                                                                                                                                                          |
|---------------------------|--------------------------------------------------------------------------------------------------------|-----------------------------------------------------------------------------------------------------------------------------------------------------------------------------------------------------------------------------------------------------------------------------------------------------------------------------------------------------------------------------------------------------------------------------------------------------------------------------------------------------------------------------------------------------------------------------------------------------------------------------------------|
| Secretary Group           | 3 to 5 staff members from sponsors and supporting organizations.                                       | (I) complete the guideline registration and draft the guideline plan<br><br>(II) investigate the clinical questions related to the guideline, design a questionnaire according to the initial clinical question list, collect questions and rank the importance of these questions<br><br>(III) coordinate the work of other working groups<br><br>(IV) organize the recommendation consensus meeting<br><br>(V) facilitate the external review process for the entire guideline<br><br>(VI) record the entire guideline development process in detail<br><br>(VII) draft the guideline<br><br>(VIII) submit the guideline for approval |
| Evidence evaluation group | 3 to 10 individuals with a background in evidence-based medicine and experience in evidence retrieval. | (I) complete the literature search, screening, evidence extraction, risk of bias evaluation, and GRADE evidence rating for the guideline<br><br>(II) complete the quality evaluation of the published systematic evaluation/meta analysis related to the guideline topic<br><br>(III) update and produce meta-analysis<br><br>(IV) create the evidence summary table and the recommendation decision table                                                                                                                                                                                                                              |
| External audit expert     | 5 to 10 experts in related fields who do not directly participate in the formulation of the guideline. | (I) evaluate and review the questions and scope of the clinical practice guidelines                                                                                                                                                                                                                                                                                                                                                                                                                                                                                                                                                     |

| Group | Composition | Responsibility                                                                                                |
|-------|-------------|---------------------------------------------------------------------------------------------------------------|
| group |             | (II) review the final recommendations<br>(III) provide specific amendments for the full text of the guideline |

Note: "Rich experience in the ICU work" is defined: (1) Years of working experience: at least five years of full-time work in an ICU. (2) Education level: a bachelor's degree or higher. (3) Professional title: intermediate or senior level.

Supplementary Table 3

| Document types and evaluations tools      |                                   |                                                                                                                                                                            |         |
|-------------------------------------------|-----------------------------------|----------------------------------------------------------------------------------------------------------------------------------------------------------------------------|---------|
| Steps                                     | Research type                     | Methodological assessment tools                                                                                                                                            | quality |
| Evidence production                       | Randomized controlled trial       | Cochrane risk of bias assessment tool                                                                                                                                      |         |
|                                           | Non-randomized experimental study | MINORS items                                                                                                                                                               |         |
|                                           | Cohort study                      | NOS scale                                                                                                                                                                  |         |
|                                           | Case-control study                | NOS scale                                                                                                                                                                  |         |
|                                           | Animal experiment                 | STAIR list                                                                                                                                                                 |         |
| Evidence synthesis                        | Systematic review/Meta-analysis   | AMSTAR 2 tool                                                                                                                                                              |         |
|                                           |                                   | OQAQ scale                                                                                                                                                                 |         |
|                                           |                                   | SQAC scale                                                                                                                                                                 |         |
|                                           | Overviews of systematic reviews   | AMSTAR 2 tool                                                                                                                                                              |         |
| Creating guidelines and conducting health | Clinical practice guidelines      | AGREEII tool                                                                                                                                                               |         |
|                                           | Health technology assessment      | Checklist for HTA report                                                                                                                                                   |         |
|                                           | Health policy research            | Experimental study: Cochrane EPOC evaluation method<br>Observational research: quality evaluation criteria for Hilton's effective public health policy project development |         |
| Dissemination of evidence                 | Clinical practice guidelines      | AGREEII tool                                                                                                                                                               |         |
|                                           | Health technology assessment      | Checklist for HTA report                                                                                                                                                   |         |
| Applied evidence                          | Decision support system           |                                                                                                                                                                            |         |
| Assessment and improvement practices      | Real-world study                  |                                                                                                                                                                            |         |

## Supplementary file

### Search Strategy for PubMed

#1 "Airway Extubation"[Mesh] OR "Airway Extubation\*"[Title/Abstract] OR "Tracheal Extubation\*"[Title/Abstract] OR "High-Frequency Ventilation"[Title/Abstract] OR "Endotracheal Extubation\*"[Title/Abstract] OR "post-extubation"[Title/Abstract] OR "Ventilator Weaning"[Mesh] OR "Weaning, Ventilator"[Title/Abstract] OR "Respirator Weaning"[Title/Abstract] OR "Mechanical Ventilator Weaning"[Title/Abstract]

#2 "Respiratory Support"[Title/Abstract] OR "high flow nasal cannula"[Title/Abstract] OR "high flow nasal oxygen"[Title/Abstract] OR "HFNC"[Title/Abstract] OR "HHFNC"[Title/Abstract] OR "HHFN"[Title/Abstract] OR "NHF\*"[Title/Abstract]

#3 ( "high flow"[Title/Abstract] AND ("Cannula"[Mesh] OR "Nasal Cannula\*"[Title/Abstract])) OR ( "high flow"[Title/Abstract] AND ("oxygen inhalation therapy"[MeSH] OR "oxygen inhalation therap\*"[Title/Abstract]))

#4 "Positive Pressure Respiration"[Mesh] OR "Noninvasive Ventilation"[Mesh] OR "Noninvasive Ventilation\*"[Title/Abstract] OR "Non-Invasive Ventilation\*"[Title/Abstract] OR "non-invasive positive pressure ventilation\*"[Title/Abstract] OR "noninvasive positive pressure ventilation\*"[Title/Abstract] OR "NIPPV"[Title/Abstract] OR "NPPV"[Title/Abstract] OR "conventional oxygen therapy"[Title/Abstract] OR "COT"[Title/Abstract] OR "standard oxygen therapy"[Title/Abstract] OR "SOT"[Title/Abstract] OR "venturi mask"[Title/Abstract] OR "face mask"[Title/Abstract] OR "bag valve mask"[Title/Abstract]

#5 #1 AND (#2 OR #3 OR #4)
